# Supplementary material
Source: PubMed Central journal article supplement (PMC3679486)
Supplement: supp_126.11.2436_JCS118117.pdf [file supp_126.11.2436_JCS118117.pdf]

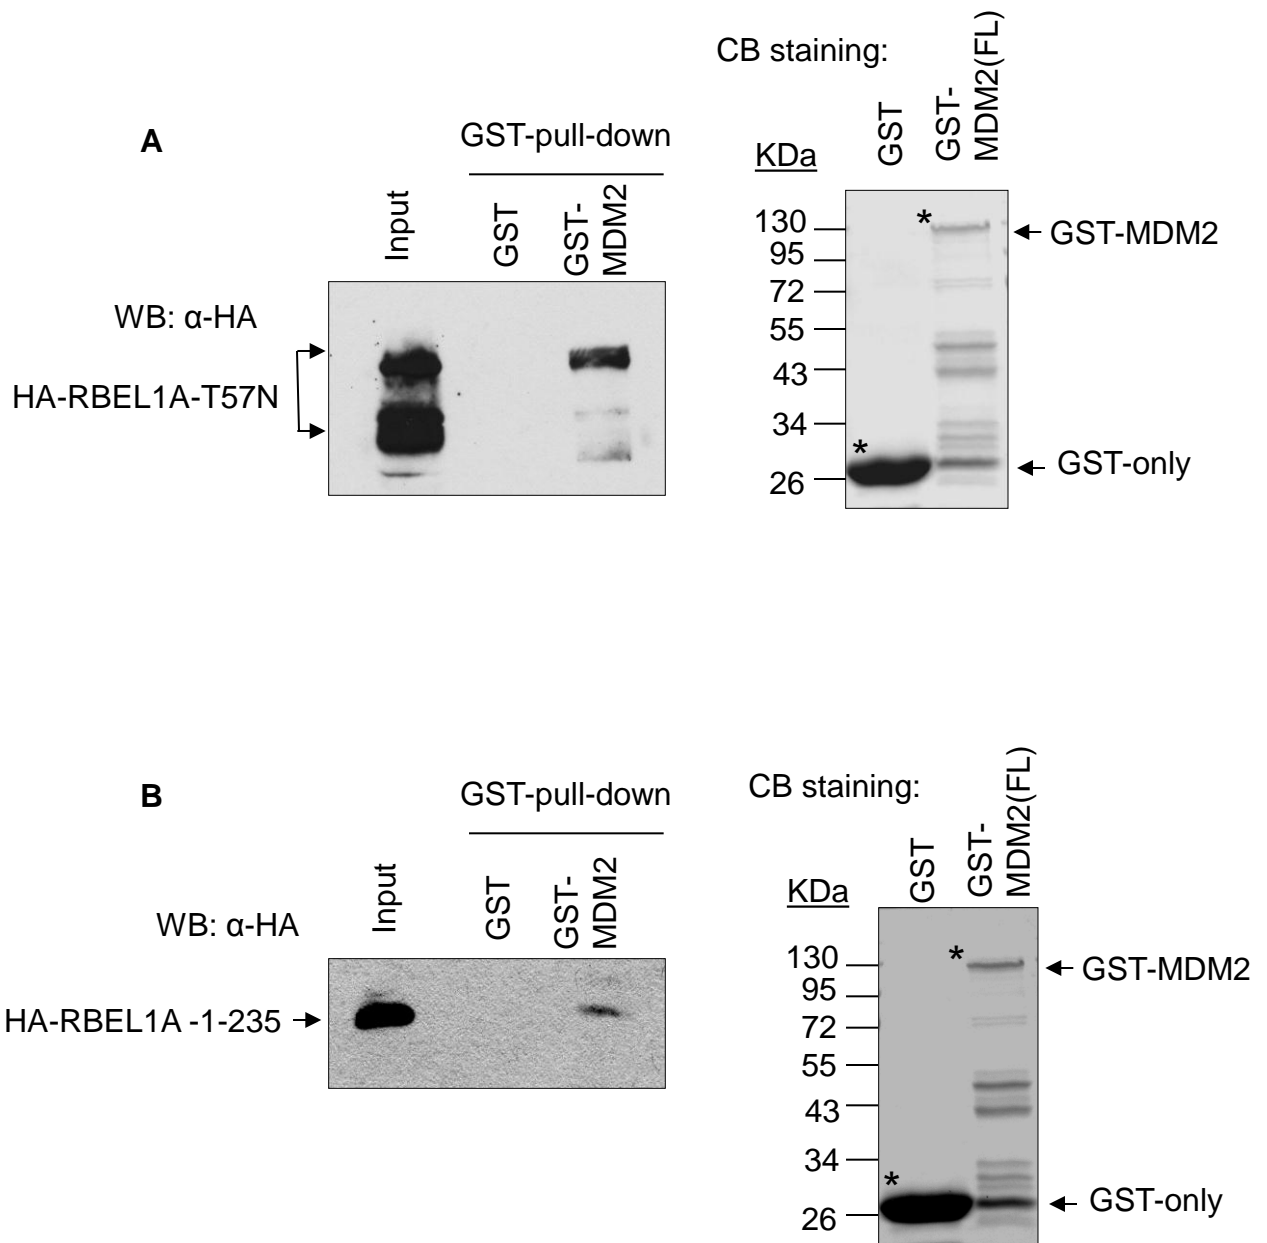

**Supplementary Figure 1. RBEL1A T57N and 1-235 variants interact with MDM2.**

Purified recombinant GST-MDM2 but not GST-only pulls down RBEL1A T57N mutant (**A**) and 1-235 mutant (**B**). About 25  $\mu$ g of GST-MDM2 (full-length) or GST-alone control were used to perform GST-pull down using 293T cell lysates overexpressing HA-T57N, or HA-1-235 mutants, and the precipitated proteins were analyzed by immunoblotting using HA-specific antibody. Coomassie blue staining of GST-MDM2 and GST-alone is shown on the right panel. Stars (\*) indicate the correctly-sized purified protein products.
